1 **Title page**

2

3 **SHORT TITLE:** Coexistence dynamics in squamates

4

5 **GEOGRAPHICAL AND ECOLOGICAL DRIVERS OF COEXISTENCE DYNAMICS IN**

6 **SQUAMATE REPTILES**

7

8 LAURA R. V. ALENCAR<sup>1,2\*</sup> & TIAGO B. QUENTAL<sup>1</sup>

9

10 <sup>1</sup>Departamento de Ecologia, Instituto de Biociências, Universidade de São Paulo, São  
11 Paulo, SP, 05508-900, Brazil

12 <sup>2</sup>Current address: Department of Ecology & Evolutionary Biology, Yale University,  
13 New Haven, CT, 06511, USA

14 \*Corresponding Author

15

16 **ACKNOWLEDGEMENTS**

17 We thank all the curators and staff from the scientific collections visited: K. De  
18 Queiroz, R. Wilson and A. Wynn (SNMNH), L. Scheinberg (CAS), F. Burbrink and D.  
19 Kizirian (AMNH), H. Zaher and A. Benetti (MZUSP), D. Rabosky and G. Schneider  
20 (UMMZ), J. Losos and J. Rosado (MCZ), J. McGuire and C. Spencer (MVZ), P.  
21 Doughty (WAM), J. Rowley, S. Mahony, C. Portway, T. Cutajar (AM). We also thank  
22 Lab MeMe members, especially G. Burin and D. Caetano, for their suggestions during  
23 the development of this study. We thank A. Pigot for kindly providing R codes and J.R.  
24 Hodge for proofreading. LRVA and TBQ thank Sao Paulo Research Foundation  
25 (FAPESP) for grants #2016/14292-1 and 2018/05462-6. This study also received a

26 Visiting Collections Fellowship awarded by the Australian Museum Research Institute  
27 to LRVA.

28

29 **CONFLICT OF INTEREST STATEMENT**

30 The authors declare no competing of interests.

31

32

33

34

35

36

37

38

39

40

41

42

43

44

45

46

47

48

49

50

51

52 **RUNNING TITLE:** Coexistence dynamics in squamates

53

54 **GEOGRAPHICAL AND ECOLOGICAL DRIVERS OF COEXISTENCE DYNAMICS IN**

55 **SQUAMATE REPTILES**

56

57 **ABSTRACT**

58 **Aim:** Species richness varies widely across space. To understand the processes behind  
59 these striking patterns, we must know what are the relevant drivers underlying species  
60 coexistence. Several factors can potentially shape species coexistence such as the  
61 speciation process, the time since divergence between lineages, environmental effects,  
62 and intrinsic properties of the organisms. For the first time, we model the coexistence  
63 dynamics of lizards and snakes across broad temporal and spatial scales, investigating  
64 the role of species interactions, dispersal ability, and geographic area.

65 **Location:** Global

66 **Time period:** Last 20 million years

67 **Major taxa studied:** Squamata (lizards and snakes)

68 **Methods:** We used 448 closely related species pairs and their age since divergence  
69 across 100 dated phylogenies. We categorized each pair as sympatric or allopatric and  
70 as occurring on islands or continents. We measured morphological traits to quantify  
71 niche divergence and used range and body size as proxies for dispersal ability. We  
72 applied a model-comparison framework in lizards and snakes separately to evaluate  
73 which factors best explained their coexistence dynamics.

74 **Results:** We found that distinct factors drive the coexistence dynamics in lizards and  
75 snakes. In snakes, species pairs that coexist tend to occur on islands and are more  
76 different in body size, suggesting that both geographical setting and species interactions

77 might be relevant factors. In contrast, we only found evidence that dispersal ability  
78 shaped the coexistence of lizards, where species coexist when they have higher  
79 dispersal abilities.

80 **Main conclusions:** Lizards and snakes greatly differ in coexistence dynamics. Higher  
81 heterogeneity in coexistence dynamics within lizards and group-specific life-history  
82 aspects might help to explain these findings. Our results emphasize that the interaction  
83 between where organisms are and who they are, ultimately shapes biodiversity patterns.  
84 We also highlight interesting avenues for further studies on species coexistence in deep  
85 time.

86

87 **KEY WORDS** dispersal ability, competition, niche divergence, snakes, lizards, islands,  
88 continents

89

90

91

92

93

94

95

96

97

98

99

100

101

102     **INTRODUCTION**

103

104             Biodiversity is heterogeneously distributed across the Earth, and to explain why  
105 certain regions comprise more species than others has been one of the major challenges  
106 in Ecology and Biogeography (Gaston, 2000; Ricklefs, 2004). At global and regional  
107 scales, the number of species is determined by speciation, extinction and migration  
108 (Wiens & Donoghue, 2004; Ricklefs, 2006). However, to fully understand such spatial  
109 variation in species richness we also need to know the mechanisms that ultimately  
110 promote species coexistence and generate the observed species richness patterns at finer  
111 spatial scales (Weber & Strauss, 2016; Pigot et al., 2018). How and why the distribution  
112 of species changes across space and time has been the focus of intense debate in the  
113 literature (e.g. Jackson & Overpeck, 2000; Sexton et al., 2009; Louthan et al., 2015).

114             Several factors can potentially shape the distribution of organisms and  
115 consequently shape species coexistence (Hutchinson, 1957; Vamosi et al., 2009; Wisz  
116 et al., 2013). Distinct speciation modes, for example, are linked to distinct predictions  
117 regarding the patterns of coexistence between two closely related species. Sympatric  
118 speciation assumes that two species will coexist since their emergence (Grossenbacher  
119 et al., 2014), whereas allopatric speciation will produce geographically isolated species  
120 (Kozak & Wiens, 2006) that can eventually expand their distributions and subsequently  
121 coexist (Pigot & Tobias, 2015; Weber & Strauss, 2016; Pigot et al., 2018). In this case,  
122 the time since divergence between lineages can play an important role in determining  
123 coexistence patterns.

124             Biotic interactions and the intrinsic properties of organisms, such as their  
125 dispersal ability, can also affect the process of geographic expansion, either accelerating  
126 or preventing species coexistence over time (Johnson & Stinchcombe, 2007; Vamosi et

127 al., 2009; Lowe & McPeck, 2014; Jønsson et al., 2016; Weber & Strauss, 2016). From  
128 an ecological perspective, the importance of competition in shaping coexistence is  
129 based on the “principle of competitive exclusion”, which suggests that species  
130 occupying similar ecological niches would not be able to coexist because they require  
131 the same limited resources to survive (Hutchinson, 1957; Hardin, 1960). The outcome  
132 of these ecological processes on an evolutionary time-scale could be character  
133 displacement among populations or a pair of species (Brown & Wilson, 1956; Schluter,  
134 2000), species sorting where only species with different ecological niches will coexist  
135 (Anderson & Weir, 2021), or even the extinction of an entire lineage (e.g. Silvestro et  
136 al., 2015). Indeed, the number of studies suggesting that competition is a relevant factor  
137 in shaping the distribution of organisms at global and macroevolutionary scales has  
138 rapidly increased (Gotelli et al., 2010; Pigot & Tobias, 2013; Silvestro et al., 2015;  
139 Pigot et al., 2018). Pigot and Tobias (2013) for example, found that the coexistence of  
140 closely related species of birds seems to be mediated by differences in their ecological  
141 niche. On the other hand, other factors might play a role, and these same authors later  
142 found that dispersal ability also determine how fast two species might expand their  
143 distributions and coexist (Pigot & Tobias, 2015; Pigot et al., 2018). Dispersal is indeed  
144 widely suggested to play a central role in the redistribution of organisms, contributing to  
145 the colonization of new areas and range shifts, representing a potentially important  
146 component driving coexistence dynamics (Lowe & McPeck, 2014; Jønsson et al., 2016;  
147 Weber & Strauss, 2016).

148         Although biotic interactions and dispersal ability have been frequently invoked to  
149 explain both spatial and temporal biodiversity patterns, the geographical scenario where  
150 species thrive is another important aspect to be considered. Islands are widely known  
151 for producing unique biodiversity patterns given their smaller size and geographic

152 isolation compared to continental settings (MacArthur & Wilson, 1967; Losos &  
153 Ricklefs, 2009; Baeckens & Van Damme, 2020). Changes in body size like gigantism  
154 and dwarfism are frequently reported in insular vertebrates ("island rule", Foster, 1964;  
155 Van Valen, 1973; see also Benítez-López et al., 2021 but see Meiri, 2007). Patterns like  
156 these are suggested to be the result of several mechanisms characterizing insular  
157 systems, such as reduced predation, relaxed inter-specific competition and resource  
158 limitation (Losos & Ricklefs, 2009; Baeckens & Van Damme, 2020; Benítez-López et  
159 al., 2021). However, the consequences of these insular particularities on the coexistence  
160 dynamics of species are less clear (Ricklefs, 2010; Pigot et al., 2018). On one hand, it is  
161 feasible to expect that coexistence might be achieved faster on islands compared to  
162 continents given that the first comprise smaller geographical limits and is usually  
163 characterized by a relaxation of biotic constraints. On the other hand, islands harbor  
164 populations that might be more likely to suffer stochastic extinctions or introgression  
165 possibly erasing any signs of sympatry (Pigot et al., 2018).

166         Several other ecological, physiological, and behavioral aspects can also influence  
167 species coexistence dynamics (Gaston, 2000; Buckley et al., 2012). Squamate reptiles  
168 (i.e. lizards and snakes) are ectothermic animals and their distributions will frequently  
169 be limited by their physiological requirements (Buckley et al., 2012; Vitt & Caldwell,  
170 2014). As a result, their distributions can be strongly determined by climatic conditions  
171 (e.g. Buckley et al., 2012). Lizards and snakes, however, comprise more than 10.000  
172 species ranging across a wide spectrum of latitudes and biomes (Roll et al., 2017; Uetz  
173 & Hosek, 2017). While the species richness of snakes shows the typical latitudinal  
174 gradient similar to endothermic organisms, lizards show a pattern distinct from any  
175 other tetrapod group, with a higher richness in Australia (see Roll et al., 2017).  
176 Furthermore, although closely related, snakes and lizards differ greatly in their

177 morphology and in several aspects of their natural history (Sites et al., 2011; Vitt &  
178 Caldwell, 2014). Generally speaking, snakes have a slower metabolism and lower  
179 population density compared to lizards (Vitt & Caldwell, 2014); lizards comprise more  
180 diverse diet habits, including insectivorous, carnivorous and even herbivorous species  
181 (Pianka & Vitt, 2003; Meiri, 2008), whereas snakes are strictly carnivorous (Greene,  
182 1997). This impressive diversity is actually an indication that species distributions in  
183 squamates might not be regulated by the same processes, and that aspects not related to  
184 climate might also play an important role in shaping species distributions (e.g. Algar et  
185 al., 2013; Cunningham et al., 2015). *Anolis* lizards, for example, comprise a classic  
186 example of squamate reptiles among which species coexistence is strongly determined  
187 by interspecific competition (Losos, 2011).

188       To reveal the relevant factors shaping the coexistence dynamics of a diverse group  
189 such as squamates, and whether snakes and lizards share or not these factors, we need  
190 investigations across broader taxonomic and spatial contexts. Here we take this  
191 approach by investigating the role of biotic interactions, dispersal ability and different  
192 geographical settings in shaping the coexistence dynamics across closely related species  
193 of squamate reptiles. To do that, we use a model-comparison framework to (1) evaluate  
194 the main speciation mode (i.e sympatric or allopatric) in lizards and snakes; (2) test if  
195 the tendency to geographically overlap over time increases in species that are  
196 ecologically distinct, (3) have high dispersal abilities, and/or (4) occur on islands. Our  
197 study is the first to explicitly model the coexistence dynamics of squamates over time in  
198 broad temporal and spatial scales. On top of that, we take into account the possible  
199 effects of different ecological and geographical scenarios in driving coexistence. Our  
200 results provide insights into the factors shaping species distributions and the dynamics  
201 of coexistence, contributing to a better understanding of the processes shaping



202 biological communities and, at a broader scale, of those that modulate the evolution of  
203 biodiversity.

204

## 205 **METHODS**

206

### 207 **Closely related species pairs**

208

209 To explore coexistence dynamics in squamates, we used one of the most  
210 complete molecular phylogenies (Tonini et al., 2016) to define a pool of species pairs  
211 ("sister" species), representing the most closely related species in the maximum-  
212 likelihood topology. Our pool included only species from well sampled genera (70% or  
213 more of all described species of a given genus had to be in the phylogeny) and for  
214 which the phylogenetic placement of species pairs was highly supported (equal to or  
215 higher than 0.95). To calculate genus sampling, we followed the taxonomy of the  
216 Reptile Database up to January 2017 (Uetz et al., 2017). We were able to identify 538  
217 species pairs (161 of snakes and 377 of lizards).

218

### 219 **Geographical ranges**

220

221 To determine if species comprising a given species pair coexist, we used species  
222 polygon range maps mostly from Roll et al. (2017). For an additional 20 species, whose  
223 maps were not available in Roll et al. (2017), we used those provided by the IUCN Red  
224 List Assessment. We used the range map provided by Birskis-Barros et al. (2019) for  
225 the South American rattlesnake *Crotalus durissus*, given the outdated distribution for  
226 this species in the previous two databases. From the 538 species pairs, we could not

227 obtain range maps for four pairs given that at least one of the species did not have a map  
228 available.

229 From the 534 species pairs for which we had range maps, we excluded species  
230 that occur in marine or mangrove environments (10 pairs) and terrestrial pairs where  
231 species are separated by marine barriers (species occurring on different landmasses or  
232 islands, see Pigot & Tobias, 2015) (those represent 57 pairs). The dispersal dynamics  
233 characterizing these species pairs might potentially differ from those where species are  
234 terrestrial and occur on the same landmass and would potentially add noise to our  
235 analyses.

236

### 237 **Age since divergence**

238

239 To model coexistence over time, we used the age since divergence of each  
240 species pair estimated by Tonini et al. (2016) as our temporal measurement.  
241 Given that estimates of age since divergence can be highly uncertain, we randomly  
242 chose 100 different phylogenies from those generated by Tonini et al. (2016) to obtain a  
243 range of possible age estimates for our species pairs. It is important to mention that  
244 these 100 phylogenies were generated using the same backbone molecular phylogeny  
245 and, therefore, the relationships between species pairs remain the same, but the age  
246 estimates differ (see Tonini et al. 2016 for details). Therefore, we incorporated in our  
247 analyses 100 different age since divergence estimates for each species pair (see below).

248 To avoid including species pairs for which evolutionary history might have been  
249 strongly influenced by extinction we set a divergence time limit to our species pairs. We  
250 first took the median of the 100 ages since divergence estimates for each pair and kept  
251 those pairs comprising a median equal to or lower than 20 million years ago. After all

252 curatorial work, our final pool comprised 448 pairs of species (132 of snakes and 316 of  
253 lizards) that we used to investigate the coexistence dynamics in squamates (see  
254 Appendix I). These 448 pairs span a wide diversity of taxonomic groups and  
255 geographical areas representing the vast diversity observed in squamates (see Figure 1).  
256 We also ran additional analyses using only those pairs for which the median of the age  
257 since divergence was equal to or lower than 10 million years ago (124 of snakes and  
258 243 of lizards), a more conservative way to include species pairs with respect to  
259 potential loss of history to extinction.

260

### 261 **Geographical overlap**

262

263 We considered a species pair as sympatric or allopatric based on the spatial  
264 overlap of their geographical ranges. We considered a pair as sympatric when more than  
265 30% of the smaller species range overlapped with the range of the other species. We  
266 also ran additional analyses considering a given pair as sympatric when the smaller  
267 range overlapped more than 70%. These additional analyses allowed us to explore if our  
268 results on the coexistence dynamics of squamates would differ depending on how we  
269 define sympatry. We quantified geographic overlap using the Raster package in R  
270 (Hijmans, 2019). We should note that we choose a simpler geographical categorization  
271 for methodological purposes (see Statistical analyses), considering as “allopatric”  
272 species pairs that might have been originated under processes such as vicariance,  
273 parapatric speciation, or founder events (see Skeels & Cardillo, 2019).

274

### 275 **Geographical and ecological traits**

276

277 *Size of the geographical area*

278

279 To explore if the size of the geographical area affects the tendency by which  
280 closely related species coexist over time, we categorized each species pair as occurring  
281 on islands or continents. We considered as islands all geographically isolated land  
282 masses smaller than Madagascar (the largest island considered). When the species  
283 comprising a given pair occurred both on islands and continents, we considered the  
284 geographical area as the one where both species occur. We did not have any cases  
285 where both the species occurred on islands and continents.

286

287 *Ecological similarity*

288

289 To quantify how ecologically similar two species are and, thus, to explore the  
290 importance of species interactions in affecting the tendency of closely related species to  
291 coexist over time, we measured specimens deposited in several scientific collections  
292 between the years of 2017 and 2019 (see supplementary methods). This massive data  
293 collection allowed us to obtain measurements for more than 2000 specimens of lizards  
294 and snakes comprising 300 and 152 species, respectively (150 and 76 sister pairs of  
295 lizards and snakes; Appendix II and III). Therefore, we were able to obtain  
296 morphological data for 47% and 57% of the pairs from our total pool (lizards and  
297 snakes, respectively). On average, we were able to measure 6 specimens per species of  
298 lizards and 5.7 specimens per species of snakes. For additional details on how we  
299 determined the sex and the sexual maturity of the specimens see the supplementary  
300 methods.

301           We focused on measuring morphological traits known to be associated with  
302 different axes of the ecological niches of squamates. Additionally, we aimed to include  
303 only males in our dataset as a way to decrease any noise caused by morphological  
304 differences resulting from sexual dimorphism. Measurements for lizards comprised  
305 snout-vent length (SVL), head length, width and height, jaw length, mid-body  
306 circumference, the length of the humerus, ulna, femur and tibia, and the distance  
307 between fore and hind limbs. Measurements for snakes comprised snout-vent length,  
308 head length, width and height, mid-body circumference, tail length and eye diameter.  
309 This dataset was combined with the morphological dataset for snakes of the family  
310 Viperidae generated by Alencar et al. (2017), and with a few measurements for snout-  
311 vent length taken from the literature (see Appendix II and III), all measurements from  
312 adult males only.

313           To explore the role of species interactions in driving the tendency of species to  
314 geographically overlap over time, we used two different metrics as proxies for  
315 ecological similarity of a given species pair. First, we calculated the absolute difference  
316 between the average of the log-transformed SVL of the species comprising each pair.  
317 The larger the difference between the SVL, the less ecologically similar species are  
318 expected to be (Wilson 1975; Ricklefs & Miles, 1994). We chose to use SVL as our  
319 metric for body size given it is traditionally used by herpetologists as a proxy for size  
320 (see Meiri, 2008). As a next step, we generated one morphospace for snakes and another  
321 for lizards but excluding legless lizards, and a second one for all lizards including  
322 legless lizards but excluding the distance between the fore and hind limbs measurement.  
323 To generate these morphospaces we first size-corrected the morphological variables  
324 (log-shape ratios) for each species by dividing each variable by the geometric mean  
325 calculated for each species (see below) and log-transforming the resulting value (Price

326 et al., 2019; Friedman et al., 2020). The geometric mean was calculated for lizards as  
327 the cube root of the product of species average SVL, mid-body circumference and  
328 length of the limbs, and for snakes as the cube root of the product of species' average  
329 SVL, tail length and mid-body circumference. We chose not to calculate the geometric  
330 mean across all morphological variables because most of them are inclusive measures  
331 of these dimensions of size (see Price et al., 2019). We chose to apply this size-  
332 correction method because it allows us to produce a metric that preserves the allometric  
333 component of shape (see Price et al., 2019). We performed phylogenetic principal  
334 component analyses using the R package phytools (Revell, 2009; Revell, 2012) to  
335 generate these morphospaces using the consensus phylogenetic tree from Tonini et al.  
336 (2016). Using these morphospaces, we calculated the Euclidean distance between  
337 species comprising each pair across all Phylogenetic axes combined. The larger the  
338 euclidean distance, the less ecologically similar species are expected to be. In the end,  
339 we had two proxies for ecological similarity, (1) differences in SVL and (2) the  
340 Euclidean distance between species pairs within the morphospace.

341 To explore if the proxies for ecological similarity, that is, differences in SVL  
342 and differences in shape (Euclidean distance) were correlated, we performed PGLS  
343 analyses using ten phylogenetic trees from Tonini et al. (2016). These analyses  
344 suggested that despite being significantly correlated in lizards ( $R^2$  0.59 – 0.77,  $p <$   
345 0.05), differences in the SVL and Euclidean distances are not correlated in snakes ( $R^2 <$   
346 0.01,  $p > 0.1$ ). In the subsequent analyses, we decided to use only the SVL differences  
347 for lizards and keep both the differences in SVL and the Euclidean distance as proxies  
348 for ecological similarity in snakes.

349

350 *Dispersal ability*

351

352           Despite often being considered a species trait, here we assess dispersal ability as  
353 a trait characterizing a given species pair due to methodological reasons (see statistical  
354 analyses below). To do this, we used two different metrics. First, we used the log-  
355 transformed ratio between the average range size of each pair and the age since the  
356 divergence of that pair. Range size can be a good proxy for dispersal ability because  
357 larger ranges might reflect a higher ability of lineages to geographically expand (Brown  
358 et al., 1996; Pigot et al., 2018). We decided to take into account the age since  
359 divergence between species comprising each pair because older lineages might have  
360 larger geographical ranges simply because they had more time to expand geographically  
361 and not as a result of dispersion ability. Therefore, the ratio between range size and age  
362 of divergence reflects the rate at which a given species pair was able to geographically  
363 expand. We calculated this ratio 100 times for each pair using the different age  
364 estimates obtained previously. As a next step, we used the average SVL for each pair.  
365 Because larger animals might also have larger home ranges and/or territories (Brown et  
366 al., 1996; Bonner, 2011), we expect that larger squamates might have higher dispersal  
367 ability. It is important to note that the analyses using average SVL as a proxy for  
368 dispersal ability included less species pairs compared to our first proxy given we  
369 measured a smaller number of species than our total species pool (see above).

370           To explore if the two proxies were correlated with each other, we performed  
371 PGLS analyses on the average snout-vent length and the average range size/age ratio,  
372 using ten randomly sampled sets of the latter and the ten corresponding phylogenetic  
373 trees from Tonini et al. (2016). Interestingly, all these analyses suggested that despite  
374 being significantly correlated ( $p < 0.05$ ), the relationships have either very low  $R^2$  (0.06

375 – 0.08, for lizards) or moderate  $R^2$  (0.14 – 0.18, for snakes). For this reason, we decided  
376 to keep both proxies in our subsequent analyses (see below).

377

### 378 **Statistical analyses**

379

380 We explored the coexistence dynamics of squamates over time by using  
381 different probabilistic models of species co-occurrence (Figure 2, Pigot et al., 2013,  
382 2015). In this framework, the dynamic of coexistence is modelled as a constant rate  
383 Markov process, and maximum likelihood is used to perform model fitting and  
384 parameter estimates. In a general manner, the models allow us to calculate the  
385 probability that a species pair exists in its current geographical state (i.e. allopatry or  
386 sympatry) given their age since divergence and the parameters controlling the rates of  
387 transition from allopatry to sympatry ( $\sigma$ ) and from sympatry to allopatry ( $\epsilon$ ) (Figure 2,  
388 see also Pigot & Tobias, 2015). Therefore, we were able to model how coexistence  
389 possibly changed over time by using a given set of species pairs. We fitted four  
390 different models to our dataset using the R package *msm* (Jackson, 2011): 1) allo-one-  
391 way, which assumes that lineages diverged in allopatry and then undergo a transition to  
392 sympatry ( $\gamma = 1$ ,  $\sigma > 0$ , and  $\epsilon = 0$ ); 2) symp-one-way, which assumes that lineages  
393 diverged in sympatry and then undergo a transition to allopatry ( $\gamma = 0$ ,  $\sigma = 0$ , and  $\epsilon > 0$ );  
394 3) allo-two-way, assumes that lineages diverged in allopatry, become sympatric but  
395 became allopatric again ( $\gamma = 1$ ,  $\sigma > 0$ ,  $\epsilon > 0$ ); Symp-two-way, which assumes that  
396 lineages diverged in sympatry, undergo a transition to allopatry but come back to  
397 sympatry later ( $\gamma = 0$ ,  $\sigma > 0$ , and  $\epsilon > 0$ ).

398 A schematic workflow of the model comparisons we performed is presented in  
399 Figure S1. First, we fitted all four models 100 times across species pairs of lizards and



400 snakes separately using their age since divergence obtained from 100 different  
401 topologies (see above). We then evaluated how many times a given model was favored  
402 over the others using the Akaike Information Criterion (Burnham & Anderson, 2002)  
403 (see Table S1-S4). We considered the best model to be the one with the lowest AIC  
404 value and with a  $\Delta AIC$  higher than two. To evaluate the effects of geographical position  
405 (island vs continent), ecological similarity (body size difference and euclidean distance)  
406 and dispersal ability (ratio of range area and age, average body size) in shaping the  
407 coexistence dynamics of squamates, we ran another set of analyses comparing all four  
408 models but also including the allo-one-way and the allo-two-way models with each  
409 candidate factor as a covariate of  $\sigma$  (the parameter describing the transition rate to  
410 sympatry). We decided not to include the Symp-two-way model with candidate factors  
411 as covariates in our model comparison because transitions to coexistence occur at a  
412 distinct stage in the symp-two-way model relative to those in the allopatric models. In  
413 summary, we performed model comparisons across the six models (allo-one-way,  
414 symp-one-way, allo-two-way, symp-two-way, allo-one-way with covariate, allo-two-  
415 way with covariate) five times for snakes and four times for lizards, including one  
416 distinct candidate driver in each of them (Table S1-S4, see summary in Figure S1). We  
417 performed model comparisons separately using each candidate factor as they frequently  
418 involved distinct species pairs datasets (e.g. morphology based proxies comprise fewer  
419 species pairs than range size, for example).

420         When candidate drivers significantly improved a model over the others, we  
421 quantified the hazard ratio to evaluate the direction of the relationship between  
422 transition rates to sympatry and the driver of coexistence (Table S5). To illustrate how  
423 transition rates to sympatry are affected by the drivers of coexistence, we extracted  
424 estimates of transition rates to sympatry under the best models selected and the

425 corresponding hazard ratios for different values of the drivers (Figure 3). We performed  
426 posterior predictive simulations to evaluate how well the best models could actually  
427 predict the empirical data (see supplementary methods).

428

## 429 **RESULTS**

430

431 For our main dataset that considered sympatric species pairs as those with at least  
432 30% of the smallest distribution overlapping and included pairs that diverged 20 million  
433 years ago or less, 37% and 48% of the species pairs are sympatric in snakes and lizards,  
434 respectively (Table S6). Proportions were very similar when considering only the  
435 species pairs with a median age since divergence of less than 10 mya (see Table S6).  
436 However, as expected, the number of sympatric pairs decreased when we considered as  
437 sympatric only those pairs with more than 70% of the smallest distribution overlapping  
438 (Table S6). Regardless of the dataset, however, lizards consistently show a higher  
439 proportion of sympatric pairs compared to snakes (Table S6). In general, sympatric  
440 pairs tend to be older than allopatric pairs among snakes (Table S7). In lizards,  
441 however, sympatric and allopatric species pairs have very similar ages of divergence,  
442 with sympatric pairs still being slightly older across datasets comprising pairs that have  
443 diverged 20 mya or less (see Table S7).

444

### 445 Coexistence dynamics in squamates

446

#### 447 *Model selection without covariates*

448 When comparing only the four models without adding any candidate traits that  
449 could potentially be driving coexistence dynamics, the “allo-two-way-model” was

450 considered the best model for about 75% of the age datasets analyzed for snakes either  
451 when considering species pairs that diverged less than 20 or 10 mya (Table S1-S2).  
452 These results suggest that snakes generate species mainly via allopatric speciation with  
453 transitions to sympatry over time and back to allopatry as lineages become older. On the  
454 other hand, by comparing the four models without adding the covariates, we could not  
455 recover a unique best model for lizards (Figure S1-S2). The symp-two-way-model and  
456 the allo-two-way-model are equally likely, which suggests that geographical overlap in  
457 lizards changed considerably through time. Additionally, no best model was detected  
458 when performing model comparison with an overlap cut-off of 70% either in lizards or  
459 snakes (see Table S3-S4).

460

#### 461 *Model selection with the geographical setting as covariate*

462

463       Being on an island or continent seems to be an important driver of species  
464 coexistence in snakes but not necessarily in lizards. When considering the two  
465 additional models that include the geographical setting as a covariate on the transition  
466 rate to sympatry, model comparisons suggested that the allo-two-way model with the  
467 covariate was the best model across all age datasets in snakes, regardless of only  
468 including younger pairs or not (Table S1-S2). According to this model, transition rates  
469 to sympatry substantially increase in species pairs of snakes occurring on islands  
470 compared to those occurring on continents (Figure 3, Table S5). When performing  
471 model comparison under the 70% overlap cut-off, the allo-two-way model with the  
472 covariate was still recovered as the best model across 76% of the age datasets in snakes.  
473 However, no single best model was recovered when considering only the younger pairs  
474 (Table S3-S4), although the model with geographical setting as covariate was still

475 among the best models (it was tied with another model in 99 out of 100 comparisons).  
476 In contrast, no best model was selected for lizards and, therefore, we do not have  
477 evidence that being on an island or continent is relevant in driving their coexistence  
478 dynamics (Table S1-S4). It is also worth mentioning that, in general, the model that  
479 includes geographical setting as a covariate was frequently not among the best tied  
480 models in lizards, with the exception of when considering the 70% overlap threshold  
481 and species pairs that diverged less than 10 mya (33, 26, 56, or 97 out of 100 model  
482 comparisons depending on the dataset, see Tables S1-S4).

483

#### 484 *Model selection with ecological similarity as covariate*

485

486 Ecological similarity seems to be an important driver of species coexistence in  
487 snakes but not in lizards. Model selection suggested that the allo-two-way model with  
488 body size difference as the covariate was the best model across all age datasets for  
489 snakes (all 100 model comparisons), regardless of whether the data were restricted to  
490 younger pairs (Table S1-S2). According to this model, transition rates to sympatry  
491 increase with increasing differences in body size between species pairs (Figure 3, Table  
492 S5). Despite always suggesting the same positive relationship, transition rates to  
493 sympatry and the hazard ratio have unreliably high values when estimated using ages of  
494 divergence extracted from some phylogenies (Figure 3, Table S5). This suggests that  
495 model fitting might have failed to converge in these datasets. However, simulations  
496 using parameter estimates under the best model are still able to recover proportions of  
497 sympatric and allopatric pairs similar to the empirical data (see below). When analyzing  
498 species pairs of snakes under the 70% overlap cut-off no model was preferred, but the  
499 model with body size difference as the covariate tied with another model about 60% of

500 the time (Table S3-S4). In contrast, we did not recover a best model when adding the  
501 differences in shape (measured by the Euclidean distance, see Methods) of species pairs  
502 as the covariate on transition rates to sympatry in snakes, although this model is  
503 frequently tied with other models (see Tables S1-S4). Additionally, we did not find  
504 strong evidence of ecological similarity being an important driver of coexistence in  
505 lizards (Table S1-S4). It is important to mention, however, that although we did not  
506 recover a best model for lizards, the model with body size difference as the covariate is  
507 among the best models in several of the model comparisons performed (Table S1-S4).

508

509 *Model selection with dispersal ability as covariate*

510

511 Contrary to the analyses above, dispersal ability seems to be a relevant driver of  
512 coexistence dynamics in lizards but not snakes (Table S1-S2). Model selection  
513 suggested that the allo-two-way model with the ratio of range size and age as the  
514 covariate was the best model across more than 80% of the age datasets of lizards when  
515 considering the overlap threshold of 30%, regardless of whether only younger pairs  
516 were included (Table S1-S2). According to this model, transition rates to sympatry  
517 increase with faster rates of geographic expansion (i.e. the larger the ratio between  
518 geographical range and time; Figure 3, Table S5). We did not recover a single best  
519 model when analyzing species pairs of lizards under the 70% overlap cut-off (Table S3-  
520 S4), but the model with dispersal as a covariate was usually among the tied models  
521 (above 80% of the comparisons). When performing model selection with mean body  
522 size (the other proxy for dispersion ability) as the covariate, we recovered the allo-two-  
523 way model that included the covariate as the best model for 57% of the age datasets but  
524 only in our main analyses (30% overlap and all species pairs, Table S1). Surprisingly,

525 however, according to this model transition rates to sympatry increase the smaller the  
526 species (Figure 3, Table S5). We did not find a single best model for these model  
527 comparisons using species pairs of snakes but models with dispersal proxies as  
528 covariates usually tied with other models (Table S1-S4).

529

530 Posterior predictive simulations

531

532 For all best models with covariates selected in our main analyses (30% overlap  
533 between species and including all species pairs), simulated proportions of sympatric  
534 pairs frequently recovered the empirical proportions (Figure S2).

535

## 536 **DISCUSSION**

537

538 In lizards and snakes, neither time or sympatric speciation alone can explain the  
539 coexistence patterns observed among extant species. On the other hand, by performing  
540 extensive data collection and comparing statistical models, we found evidence for  
541 completely distinct drivers underlying the coexistence dynamics of these two closely  
542 related groups. In general, our results suggest that the species' geographical setting,  
543 ecologically similarity, and dispersal ability might play different roles in shaping the  
544 coexistence dynamics within each taxonomic group analyzed.

545 By taking a first look at the patterns of geographical overlap, we found that most  
546 species pairs of snakes are allopatric. Allopatric speciation is indeed the rule across  
547 vertebrates, with many vertebrate groups having more allopatric than sympatric sister  
548 species (Barraclough & Vogler, 2000; Pigot & Tobias, 2015; García-Navas et al., 2020;  
549 see review in Hernández-Hernández et al., 2021). In lizards, however, allopatric and

550 sympatric pairs had similar proportions. Allopatric pairs of snakes tend to be younger  
551 than sympatric ones, which conforms to a scenario where coexistence would be  
552 achieved with time. Indeed, without adding any covariates, the coexistence dynamics in  
553 snakes are best described by allopatric speciation with lineages eventually becoming  
554 sympatric as time goes by and becoming allopatric again as they get older (allo-two-  
555 way model, Table S1-S2). In lizards, on the other hand, sympatric species and allopatric  
556 pairs tend to have very similar ages, with allopatric pairs being older in some cases  
557 (Table S7). This result might suggest two scenarios: (1) sympatric speciation plays an  
558 important role in the diversification of lizards; (2) allopatric speciation is still the rule,  
559 but time alone does not explain the coexistence dynamics of lizards. In any case, we  
560 indeed could not recover a single best model in the first set of model comparisons for  
561 the group (Table S1-S4). It is worth noting that when a single model is chosen in  
562 lizards, the sympatric model is the one selected (19 vs 1, Table S1), and when two  
563 models are equally likely (80% of the time), the sympatric model is also among them  
564 (Table S1).

565       Taken together, these first results suggest that lizards might be more  
566 heterogeneous and have more dynamic distributions compared to snakes, either because  
567 their lineages are influenced by different processes and/or because their distributions  
568 change more through time. A wider array of processes acting simultaneously could  
569 potentially mask coexistence signals when we include all species in the same category  
570 “Lizards”. Indeed, lizards occurring in the same islands can show completely distinct  
571 patterns of diversification. At the Socotra Archipelago, for example, closely related  
572 species of the genera *Hemidactylus* and *Haemodracon* show sympatric distributions  
573 with marked differences in body size, whereas those of the genus *Pristurus* tend to be  
574 allopatric or parapatric with no apparent divergence in body size (see García-Porta et

575 al., 2016). Furthermore, species richness can indeed be achieved via distinct pathways  
576 in distinct lizard clades and geographic regions. High species richness is associated with  
577 low functional divergence in agamids and gekkoes but with high functional diversity in  
578 varanids and scincids (Skeels et al., 2020). Exploring whether distinct clades are also  
579 characterized by distinct coexistence dynamics might be an interesting next step.  
580 However, we would need a much higher number of phylogenetically well-supported  
581 species pairs within each of the distinct clades to explore group-specific coexistence  
582 dynamics.

583         When adding covariates to the transition rates to sympatry, the allo-two-way  
584 model is frequently recovered as the best model across the analyses for which we were  
585 able to recover a single best model. In contrast to previous findings in birds (Pigot et al.,  
586 2018), islands seem to promote species coexistence in snakes. Surprisingly, however,  
587 this effect was not evident in lizards. In other words, the model with the geographical  
588 setting as covariate does not have higher support compared to those without the  
589 covariate in lizards. Indeed, in this set of analyses for lizards, ties were mainly between  
590 the allo-two-way and symp-two-way models that lack covariates (Table S1). In general,  
591 snakes have a slower life history and lower energetic demands compared to lizards  
592 (Pough, 1973; Vitt & Caldwell, 2014). Therefore, resources on islands might appear  
593 less scarce for snakes than lizards, potentially allowing snakes to more easily coexist in  
594 insular environments given the relaxation of some biotic constraints (e.g. predation, and  
595 perhaps less intense competition) and the smaller geographical limits of islands  
596 compared with continental settings. Lizards, on the other hand, have high population  
597 densities on islands (Novosolov et al., 2015) and the resultant scarcity of resources  
598 might lead to much more intense competition. Hence, the smaller geographical limits



599 would not increase coexistence in insular lizards at least when compared with  
600 continental settings.

601 Species interactions also underlie species coexistence in snakes, and divergence  
602 in body size (but not shape) seems to be the most likely route to avoid competition and  
603 promote coexistence, similar to what has been suggested for birds (Pigot et al., 2018).  
604 On the other hand, we found no definitive or clear evidence that ecological similarity is  
605 a relevant driver of species coexistence in lizards. For 99% of the time when we had  
606 more than one best model (a tie) the model involving ecological divergence (complex-  
607 allo-two-way) was among them for lizards (Table S1). The prediction that the likelihood  
608 of coexistence increases with increasing the ecological difference between species,  
609 assumes that some species pairs would accumulate more morphological differences  
610 allopatrically allowing them to coexist faster than others (i.e. species sorting, Grant,  
611 1972; Davies et al., 2007). Although we did not find definitive support for this  
612 prediction in lizards, morphological divergence could still be driving the coexistence  
613 dynamics at the local scale. If this is the case, we would expect that sympatric  
614 populations of a given species pair would be more morphologically distinct compared to  
615 allopatric populations of these same species (character displacement, Brown & Wilson,  
616 1956; Davies et al., 2007). We might not have been able to capture these smaller-scale  
617 differences given our large-scale approach and goals. A fruitful next step would be to  
618 apply recently developed and promising frameworks to detangle the role of species  
619 sorting and character displacement in speciation and species coexistence dynamics (see  
620 Anderson & Weir, 2021), and to increase the intra-specific morphological sampling  
621 allowing us to compare morphological divergence at the population-level.

622 Even though competition has widely been seen as an important factor shaping  
623 community structure (e.g. Darwin, 1859; Webb et al., 2002; Cavender-Bares et al.,

624 2009), a lack of strong evidence of competitive interactions shaping trait-divergence has  
625 also been suggested (e.g. Meiri et al., 2011; Stuart & Losos, 2013; Shi et al., 2018,  
626 Slavenko et al., 2021). Slavenko et al. (2021) suggested that environmental filtering  
627 might be more important in driving morphological divergence in lizards than  
628 competitive interactions, which could potentially explain why we did not find clear  
629 evidence for morphological differences mediating coexistence dynamics in lizards.  
630 Another possibility is that morphological divergence could be more relevant in some  
631 geographical regions than others or within some groups of lizards (see Skeels et al.,  
632 2020). Competition might be more prevalent in climatically stable areas (Dobzhansky,  
633 1950; MacArthur, 1969; Henriques-Silva et al., 2019) or regions with lower resource  
634 availability and, therefore, morphological divergence could be an important driver of  
635 coexistence at lower compared with higher latitudes or on islands compared with  
636 continents (e.g. García-Porta et al., 2016), respectively.

637         In contrast to what we found for competitive interactions, dispersal ability  
638 (measured by the ratio between range size and age of divergence) seems to be a relevant  
639 driver of species coexistence in lizards but not necessarily in snakes. It is worth  
640 mentioning that our dispersal metric that uses range size/age has its limitations and  
641 assumptions. For example, it is thought that species might both start and go extinct with  
642 smaller range sizes (Foote, 2007). Hence we might be pulling together species at very  
643 different stages which might mask the potential effect of dispersal and perhaps explain  
644 the lack of dispersal effects in snakes. By restricting the time window of analysis, this  
645 problem might be ameliorated but not explicitly taken into account. However, the lack  
646 of an association is still present in snakes when considering species pairs that diverged  
647 less than 10 Mya.

648 Lizards indeed have been suggested to have comparatively higher dispersal  
649 abilities than snakes, at least regarding long-distance dispersal to oceanic islands (see  
650 Pitta et al., 2013). It is important to note, however, that we are not able to disentangle  
651 between the ability to move across geographical space and the ability to establish  
652 populations in new geographical areas (see Jønsson et al., 2016), as we considered both  
653 as being part of the “dispersal ability” of species. Simply being more mobile across  
654 space would not necessarily mean that species would successfully establish populations  
655 in new geographical areas, possibly allowing species coexistence. This scenario has the  
656 potential to be especially true for snakes, for which our results suggest that competitive  
657 interactions are relevant drivers of species coexistence. Therefore, in snakes, only those  
658 species that are different enough might be able to rapidly coexist, even if others have  
659 high dispersal abilities. The establishment of populations, and consequently coexistence  
660 among species, might also be compromised if not enough time has elapsed for strong  
661 reproductive barriers to emerge and prevent populations from fusing (Weir & Price,  
662 2011). The interaction between dispersal and competition, as well as between  
663 competition and geographical setting, in driving species coexistence deserves further  
664 investigation (see Lowe & McPeck, 2014; Jønsson et al., 2016). Indeed, the statistical  
665 framework to explore the interaction between coexistence drivers is already available  
666 (Pigot et al., 2016, 2018). However, we would need a much higher number of  
667 phylogenetically well-supported species pairs, as well as their morphological  
668 information to be able to properly investigate these questions.

669 Despite being favored in some of the model comparisons, models with mean  
670 body size as the covariate on the transition rates to sympatry suggested that the smaller  
671 the lizard the higher these transition rates. This might look unexpected given that both  
672 proxies for dispersal ability (ratio between range and age, and body size) were

673 positively, despite weakly, correlated (see Methods). However, the body size dataset  
674 comprises a much smaller number of sister pairs compared to the range and age ratio  
675 dataset, which could explain the differences in the coexistence dynamics depicted by the  
676 models.

677         On the other hand, we cannot rule out the possibility that the preconception that  
678 larger species would be better dispersers might not be totally true for lizards. Going  
679 further, the reason for a negative relationship between body size and the transition rates  
680 to sympatry could be interpreted in light of the well-known link between body size and  
681 specific axes of the ecological niche in animals (Peters, 1986; Meiri, 2008; Clarke,  
682 2021). Contrary to what has been suggested for several other organisms, Costa et al.  
683 (2008) found that body size is negatively related to dietary niche-breadth in predatory  
684 lizards and, therefore, the diversity of prey consumed decreases as body size increases.  
685 Furthermore, several small lizard species are insectivorous (Pianka & Vitt, 2003) and  
686 might face less severe pressures when dealing with the scarcity of food resources  
687 compared to larger species that may rely on more limited food availability. This, in turn,  
688 might enable smaller species to share the same resources and coexist. Although some  
689 large bodied species of lizards are herbivorous, meaning that their food might be readily  
690 available in some environments, the higher total metabolic rate of larger animals also  
691 requires a greater caloric intake (Pough, 1973). Coupled with that, small insectivorous  
692 lizards can be more mobile than larger herbivorous due to the higher energetic food  
693 taken by the first (Pough, 1973). All of these factors could help to explain a higher  
694 incidence of coexistence over time in smaller lizards.

695         Going further, the relative importance of each coexistence driver in distinct  
696 stages of the coexistence process is an aspect that deserves to be explored in squamates.  
697 As found by Pigot et al. (2018), patterns of narrow geographic overlap in birds seem to

698 be driven by dispersal abilities and age, whereas wider coexistence patterns are mainly  
699 driven by ecosystem productivity and niche-divergence. For several of the analyses  
700 performed here, especially when considering as sympatric the species pairs with a  
701 geographic overlap higher than 70% of the smallest distribution, model comparisons  
702 were not able to choose between models. This probably occurs because using the 70%  
703 cut-off inevitably decreases the number of sympatric pairs, probably affecting the  
704 ability of these analyses to discern between models. Therefore, the addition of more  
705 well-supported species pairs coupled with their morphological information is essential  
706 to detangle between the differential drivers of species coexistence in distinct moments  
707 in the past.

708

## 709 **Conclusions**

710 This study shows that lizards and snakes, although closely related, differ greatly  
711 in the drivers of species coexistence. Speciation seems to predominantly occur via  
712 allopatric speciation in snakes. Lizards, on the other hand, seem to be more  
713 heterogeneous and have more dynamic distributions, which likely prevented us from  
714 recovering a single best model without the addition of covariates (see Results). In  
715 snakes, species that occur on islands or have different body sizes are more likely to  
716 coexist. In contrast, lizard species are more likely to co-occur when they have higher  
717 dispersal abilities.

718 Indeed, it has been widely shown that lizards tend to exhibit unique diversity  
719 patterns that frequently do not follow the “rules” that usually apply to snakes or other  
720 vertebrate groups (Meiri, 2007; Powney et al., 2010; Roll et al., 2017; Novosolov et al.,  
721 2018). These differences might have profound consequences either for community  
722 structure and lineage diversification, and care should be taken when analyzing these two

723 taxonomic groups together (see also Slavenko et al., 2019; Whiting & Fox, 2020).  
724 Beyond this, our results emphasize that when analyzing biogeographical,  
725 macroecological or macroevolutionary patterns and processes, one should take into  
726 account not only the geographical scenario but also who these organisms are (see also  
727 White, 2016; Skeels et al., 2020). It is the interaction between where and who that will  
728 ultimately shape biodiversity patterns.

729

## 730 **REFERENCES**

731

732 Alencar, L. R. V., Martins, M., Burin, G., & Quental, T. B. (2017). Arboreality  
733 constrains morphological evolution but not species diversification in vipers.  
734 *Proceedings of the Royal Society B*, 284, 20171775.

735

736 Algar, A. C., Mahler, D. L., Glor, R. E., & Losos, J. B. (2013). Niche incumbency,  
737 dispersal limitation and climate shape geographical distributions in a species-rich island  
738 adaptive radiation. *Global Ecology Biogeography*, 22, 391-402.

739

740 Anderson, S. A. S., & Weir, J. T. (2021). Character displacement drives trait divergence  
741 in a continental fauna. *Proceedings of the National Academy of Sciences of the United*  
742 *States of America*, 118, e2021209118.

743

744 Baeckens, S., & Van Damme, R. V. (2020). The island syndrome. *Current Biology*, 30,  
745 329-339.

746

747 Barraclough, T. G., & Vogler, A. P. (2000). Detecting the Geographical Pattern of  
748 Speciation from Species-Level Phylogenies. *The American Naturalist*, 155, 419-434.

749

750 Benítez-López, A., Santini, L., Gallego-Zamorano, J., Milá, B., Walkden, P.,  
751 Huijbregts, M. A. J., & Tobias, A. J. (2021). The island explains consistent pattern of  
752 body size evolution in terrestrial vertebrates. *Nature Ecology & Evolution*, 5, 768-786.

753

- 754 Birskis-Barros, I., Alencar, L. R. V., Prado, P. I., Böhm, M., & Martins, M. (2019).  
755 Ecological and conservation correlates of rarity in New World pitvipers. *Diversity*, 11,  
756 1-15.  
757
- 758 Bonner, J. T. (2011). *Why size matters: From bacteria to blue whales*. Princeton:  
759 Princeton University Press.  
760
- 761 Brown Jr, W. L., & Wilson, E. O. (1956). Character displacement. *Systematic Zoology*  
762 5:49-64.  
763
- 764 Brown, J. H., Stevens, G. C., & Kaufman, D. M. (1996). *Annual Review of Ecology*  
765 *and Systematics*, 27, 597-623.  
766
- 767 Buckley, L. B., Hurlbert, A. H., & Jetz, W. 2012. Broad-scale ecological implications of  
768 ectothermy and endothermy in changing environments. *Global Ecology and*  
769 *Biogeography*, 21, 873-885.  
770
- 771 Burnham, K. P., & Anderson, D. R. (2002). *Model selection and mixed model*  
772 *inference: a practical information-theoretic approach*. New York: Springer.  
773
- 774 Cavender-Bares, J., Kozak, K. H., Fine, P. V. A., & Kembel, S. W. (2009). The  
775 merging of community ecology and phylogenetic biology. *Ecology Letters*, 12, 693-  
776 715.  
777
- 778 Clarke, J. T. (2021). Evidence for general size-by-habitat rules in actinopterygian fishes  
779 across nine scales of observation. *Ecology Letters*, 24, 1569-1581.  
780
- 781 Costa, G. C., Vitt, L. J., Pianka, E. R., Mesquita, D. O., & Colli, G. R. (2008). Optimal  
782 foraging constrains macroecological patterns: body size and dietary niche breadth in  
783 lizards. *Global Ecology and Biogeography*, 17, 670-677.  
784
- 785 Cunningham, H. R., Rissler, L. J., Buckley, L. B., & Urban, M. C. (2015). Abiotic and  
786 biotic constraints across reptile and amphibian ranges. *Ecography*, 38, 001-008.  
787

- 788 Darwin, C. (1859). *The Origin of Species by Means of Natural Selection*. London:  
789 Murray.  
790
- 791 Davies, T. J., Meiri, S., Barraclough, T. G., & Gittleman, J. L. (2007). Species co-  
792 existence and character divergence across carnivores. *Ecology Letters*, 10, 146-152.  
793
- 794 Dobzhansky, T. (1950). Evolution in the tropics. *American Scientist*, 38, 208-221.  
795
- 796 Foote, M. (2007). Symmetric waxing and waning of marine invertebrate genera.  
797 *Paleobiology*, 33, 517-529.  
798
- 799 Foster, J. B. (1964). Evolution of mammals on islands. *Nature*, 202, 234-235.  
800
- 801 Friedman, S. T., Price, S. A., Corn, K. A., Larouche, O., Martinez, C. M., &  
802 Wainwright, P.C. (2020). Body shape diversification along the benthic-pelagic axis in  
803 marine fishes. *Proceedings of the Royal Society B*, 287, 20201053.  
804
- 805 García-Navas, V., Kear, B. P., & Westerman, M. (2020). The geography of speciation  
806 in dasyurid marsupials. *Journal of Biogeography*, 47, 2042-2053.  
807
- 808 García-Porta, J., Morales, H. E., Gómez-Díaz, E., Sindaco, R., & Carranza, S. (2016).  
809 Patterns of diversification in islands: A comparative study across three gecko genera in  
810 the Socotra Archipelago. *Molecular Phylogenetics and Evolution*, 98, 288-299.  
811
- 812 Gaston, K. J. (2000). Global patterns in biodiversity. *Nature*, 405, 220-227.  
813
- 814 Gotelli, N. J., Graves, G. R., & Rahbek, C. (2010). Macroecological signals of species  
815 interactions in the Danish avifauna. *Proceedings of the National Academy of Sciences*  
816 *of the United States of America*, 107, 5030-5035.  
817
- 818 Grant, P. R. (1972). Convergent and divergent character displacement. *Biological*  
819 *Journal of the Linnean Society*, 4, 39-68.  
820



- 821 Greene, H. W. (1997). Snakes: The evolution of mystery in nature. Berkeley: University  
822 of California Press.  
823
- 824 Grossenbacher, D. L., Veloz, S. D., & Sexton, J. P. (2014). Niche and range size  
825 patterns suggest that speciation begins in small, ecologically diverged populations in  
826 North American Monkeyflowers (*Mimulus* spp.). *Evolution*, 68, 1270-1280.  
827
- 828 Hardin, G. (1960). The competitive exclusion principle. *Science*, 131, 1292-1297.  
829
- 830 Henriques-Silva, R., Kubisch, A., & Peres-Neto, P. R. (2019). Latitudinal-diversity  
831 gradients can be shaped by biotic processes: new insights from an eco-evolutionary  
832 model. *Ecography*, 42, 259-271.  
833
- 834 Hernández-Hernández, T., Miller, E. C., Román-Palacios, & Wiens, J. J. (2021).  
835 Speciation across the tree of life. *Biological Reviews*, 96, 1205-1242.  
836
- 837 Hijmans, R. J. (2019). raster: Geographic Data Analysis and Modeling. R package  
838 version 3.4-13. <https://CRAN.R-project.org/package=raster>  
839
- 840 Hutchinson, G. E. (1957). Concluding remarks. *Cold springs Harbor Symposia on*  
841 *Quantitative Biology*, 22, 415-427.  
842
- 843 Jackson, C. H. (2011). Multi-State Models for Panel Data: The msm Package for R.  
844 *Journal of Statistical Software*, 38, 1-29.  
845
- 846 Jackson, S. T., & Overpeck, J. T. (2000). Responses of plant populations and  
847 communities to environmental changes of the late quaternary. *Paleobiology*, 26, 194-  
848 220.  
849
- 850 Johnson, M. T. J., & Stinchcombe, J. R. (2007). An emerging synthesis between  
851 community ecology and evolutionary biology. *Trends in Ecology and Evolution*, 22,  
852 250-257.  
853

- 854 Jønsson, K. A., Tøttrup, A. P., Borregaard, M. K., Keith, S.A., Rahbek, C., & Thorup,  
855 K. 2016. Tracking animal dispersal: from individual movement to community assembly  
856 and global range dynamics. *Trends in Ecology and Evolution*, 31, 204-214.  
857
- 858 Kozak, K. H., & Wiens, J. J. (2006). Does niche conservatism promote speciation? A  
859 case study in North American Salamanders. *Evolution*, 60, 2604-2621.  
860
- 861 Losos, J. B. (2011). *Lizards in an evolutionary tree: ecology and adaptive radiation of*  
862 *Anoles*. Berkeley: University of California Press.  
863
- 864 Losos, J. B., & Ricklefs, R.E. (2009). Adaptation and diversification on islands. *Nature*,  
865 457, 830-836.  
866
- 867 Louthan, A.M., Doak, D.F., & Angert, A.L. (2015). Where and when do species  
868 interactions set range limits? *Trends in Ecology and Evolution*, 30, 780-792.  
869
- 870 Lowe, W. H., & McPeck, M. A. (2014). Is dispersal neutral? *Trends in Ecology and*  
871 *Evolution*, 29, 444-450.  
872
- 873 MacArthur, R. H. (1969). Patterns and communities in the tropics. *Biological Journal of*  
874 *the Linnean Society*, 1, 19-30.  
875
- 876 MacArthur, R. H., & Wilson, E. O. (1967). *The Theory of Island Biogeography*.  
877 Princeton: Princeton University Press.  
878
- 879 Meiri, S. (2007). Size evolution in island lizards. *Global Ecology and Biogeography*,  
880 16, 702-708.  
881
- 882 Meiri, S. (2008). Evolution and ecology of lizard body sizes. *Global Ecology and*  
883 *Biogeography*, 17, 724-734.  
884
- 885 Meiri, S., Simberloff, D., & Dayan, T. (2011). Community-wide character displacement  
886 in the presence of clines: A test of Holarctic weasel guilds. *Journal of Animal Ecology*,  
887 80, 824-834.

888

889 Novosolov, M., Rodda, G. H., Feldman, A., Kadison, A. E., Dor, R., & Meiri, S.  
890 (2015). Power in numbers. Drivers of high population density in insular lizards. *Global*  
891 *Ecology and Biogeography*, 25, 87-95.

892

893 Novosolov, M., Rodda, G. H., Gainsbury, A. M., & Meiri, S. (2018). Dietary niche  
894 variation and its relationship to lizard population density. *Journal of Animal Ecology*,  
895 87, 285-292.

896

897 Peters, R. H. (1986). *The ecological implications of body size*. Cambridge: Cambridge  
898 University Press.

899

900 Pianka, E. R., & Vitt, L. J. (2003). *Lizards: Windows to the evolution of diversity*.  
901 Berkeley: University of California Press.

902

903 Pigot, A. L., Jetz, W., Sheard, C., & Tobias, J. A. (2018). The macroecological  
904 dynamics of species coexistence in birds. *Nature Ecology & Evolution*, 2, 1112-1119.

905

906 Pigot, A. L., & Tobias, J. A. (2013). Species interactions constrain geographic range  
907 expansion over evolutionary time. *Ecology Letters*, 16, 330-338.

908

909 Pigot, A. L., & Tobias, J. A. (2015). Dispersal and the transition to sympatry in  
910 vertebrates. *Proceedings of the Royal Society B*, 282, 20141929.

911

912 Pigot, A. L., Tobias, J. A., & Jetz, W. (2016). Energetic constraints on species  
913 coexistence in birds. *Plos Biology*, 14, e1002407.

914

915 Pitta, E., Kassara, C., Giokas, S., & Sfenthourakis, S. (2013). Compositional  
916 dissimilarity patterns of reptiles and amphibians in insular systems around the world.  
917 *Ecological Research*, 28, 633-642.

918

919 Pough, F.H. (1973). Lizard energetics and diet. *Ecology*, 54, 837-844.

920

- 921 Powney, G. D., Grenyer, R., Orme, C. D. L., Owens, I. P. F., & Meiri, S. (2010). Hot,  
922 dry and different: Australian lizard richness is unlike that of mammals, amphibians and  
923 birds. *Global Ecology and Biogeography*, 19, 386-396.  
924
- 925 Price, S. A., Friedman, S. T., Corn, K. A., Martinez, C. M., Larouche, O., &  
926 Wainwright, P. C. (2019). Building a body shape morphospace of Teleostean fishes.  
927 *Integrative and Comparative Biology*, 59, 716-730.  
928
- 929 Revell, L. J. (2009). Size-correction and principal components for interspecific  
930 comparative studies. *Evolution*, 63, 3258-3268.  
931
- 932 Revell, L. J. (2012). Phytools: an R package for phylogenetic comparative biology (and  
933 other things). *Methods in Ecology and Evolution*, 3, 217-223.  
934
- 935 Ricklefs, R. E. (2004). A comprehensive framework for global patterns in biodiversity.  
936 *Ecology Letters*, 7, 1-15.  
937
- 938 Ricklefs, R. E. (2006). Evolutionary diversification and the origin of the diversity-  
939 environment relationship. *Ecology*, 87, S3-S13.  
940
- 941 Ricklefs, R. E. (2010). Host–pathogen coevolution, secondary sympatry and species  
942 diversification. *Philosophical Transaction of the Royal Society of London B*, 365, 1139-  
943 1147.  
944
- 945 Ricklefs, R. E., & Miles, D. B. (1994). Ecological and evolutionary inferences from  
946 morphology: an ecological perspective. In: Wainwright, P. C., Reilly, S. M. (Eds.),  
947 *Ecological morphology: Integrative organismal biology* (pp. 13-41). Chicago:  
948 University of Chicago Press.  
949
- 950 Roll, U., Feldman, A., Novosolov, M., Allison, A., Bauer, A. M., Bernard, R., Böhm,  
951 M., et al. (2017). The global distribution of tetrapods reveals a need for targeted reptile  
952 conservation. *Nature Ecology & Evolution*, 1, 1677-1682.  
953

- 954 Schluter, D. (2000). Ecological character displacement in adaptive radiations. *American*  
955 *Naturalist*, 156, S4-S16.  
956
- 957 Sexton, J. P., McIntyre, P. J., Angert, A. L., & Rice, K. J. (2009). Evolution and  
958 ecology of species range limits. *Annual Review of Ecology, Evolution and Systematics*,  
959 40, 415-436.  
960
- 961 Shi, J. J., Westeen, E. P., Katlein, N. T., Dumont, E. R., & Rabosky, D. L. (2018).  
962 Ecomorphological and phylogenetic controls on sympatry across extant bats. *Journal of*  
963 *Biogeography*, 45, 1560-1570.  
964
- 965 Silvestro, D., Antonelli, A., Salamin, N., & Quental, T. B. (2015). The role of clade  
966 competition in the diversification of North American canids. *Proceedings of the*  
967 *National Academy of Sciences of the United States of America*, 112, 8684-8689.  
968
- 969 Sites, J. W., Reeder, T. W., & Wiens, J. J. 2011. Phylogenetic insights on evolutionary  
970 novelties in lizards and snakes: sex, birth, bodies, niches and venom. *Annual Review of*  
971 *Ecology, Evolution and Systematics*, 42, 227-244.  
972
- 973 Skeels, A., & Cardillo, M. (2019). Reconstructing geography of speciation from  
974 contemporary biodiversity data. *The American Naturalist*, 193, 240-255.  
975
- 976 Skeels, A., Esquerré, D., & Cardillo, M. (2020). Alternative pathways to diversity  
977 across ecologically distinct lizard radiations. *Global Ecology and Biogeography*, 29,  
978 454-469.  
979
- 980 Slavenko, A., Allison, A., & Meiri, S. (2021). Elevation is a stronger predictor of  
981 morphological trait divergence than competition in a radiation of tropical lizards.  
982 *Journal of Animal Ecology*, 90, 917-930.  
983
- 984 Slavenko, A., Feldman, A., Allison, A., Bauer, A. M., Böhm, M., Chirio, L., Colli, G.  
985 R. et al. (2019). Global patterns of body size evolution in squamate reptiles are not  
986 driven by climate. *Global Ecology and Biogeography*, 28, 471-483.  
987

- 988 Stuart, Y. E., & Losos, J. B. (2013). Ecological character displacement: glass half full or  
989 half empty. *Trends in Ecology and Evolution*, 28, 402-408.  
990
- 991 Tonini, J. F. R., Beard, K. H., Ferreira, R. B., Jetz, W., & Pyron, R. A. (2016). Fully-  
992 sampled phylogenies of squamates reveal evolutionary patterns in threat status.  
993 *Biological Conservation*, 204, 23-31.  
994
- 995 Vamosi, S. M., Heard, S. B., Vamosi, J. C., & Webb, C. O. (2009). Emerging patterns  
996 in the comparative analysis of phylogenetic community structure. *Molecular Ecology*,  
997 18, 572-592.  
998
- 999 Van Valen, L. (1973). A new evolutionary law. *Evolutionary Theory*, 1, 1-30.  
1000
- 1001 Vitt, L. J., & Caldwell, J. P. (2014). *Herpetology*. Cambridge: Academic Press.  
1002
- 1003 Uetz, P. & Hosek, J. (2017). The reptile database. <http://www.reptile-database.org>.  
1004
- 1005 Webb, C. O., Ackerly, D. D., McPeck, M. A., & Donoghue, M. J. (2002). Phylogenies  
1006 and community ecology. *Annual Review of Ecology and Systematics*, 33, 475-505.  
1007
- 1008 Weber, M. G., & Strauss, S. Y. (2016). Coexistence in close relatives: beyond  
1009 competition and reproductive isolation in sister taxa. *Annual Review of Ecology*,  
1010 *Evolution and Systematics*, 47, 359-381.  
1011
- 1012 Weir J. T., & Price T. D. (2011). Limits to Speciation Inferred from Times to Secondary  
1013 Sympatry and Ages of Hybridizing Species along a Latitudinal Gradient. *The American*  
1014 *Naturalist* 177:462-469.  
1015
- 1016 White, A. E. (2016). Geographical Barriers and Dispersal Propensity Interact to Limit  
1017 Range Expansions of Himalayan Birds. *The American Naturalist*, 188, 99-112.  
1018
- 1019 Whiting, E. T., & Fox, D. L. (2020). Latitudinal and environmental patterns of species  
1020 richness in lizards and snakes across continental North America. *Journal of*  
1021 *Biogeography*, 48, 291-304.

1022

1023 Wiens, J. J., & Donoghue, M. J. (2004). Historical biogeography, ecology and species  
1024 richness. *Trends in Ecology and Evolution*, 19, 639-644.

1025

1026 Wilson, D. S. (1975). The adequacy of body size as a niche difference. *The American*  
1027 *Naturalist*, 109, 769-784.

1028

1029 Wisz, M. S., Pottier, J., Kissling, D.K., Pellisier, L., Lenoir, J., Damgaard, C. F., &  
1030 Dormann, C. F. (2013). The role of biotic interactions in shaping distributions and  
1031 realised assemblages of species: implications for species distribution modelling.  
1032 *Biological Reviews*, 88, 15-30.

1033 **DATA AVAILABILITY**

1034 Data used in this study are part of the supplementary material or have been published  
1035 elsewhere.

1036

1037

1038

1039

1040

1041

1042

1043

1044

1045

1046

1047

1048

1049

1050

1051

1052

1053

1054

1055

1056

1057

1058

**FIGURE LEGENDS**



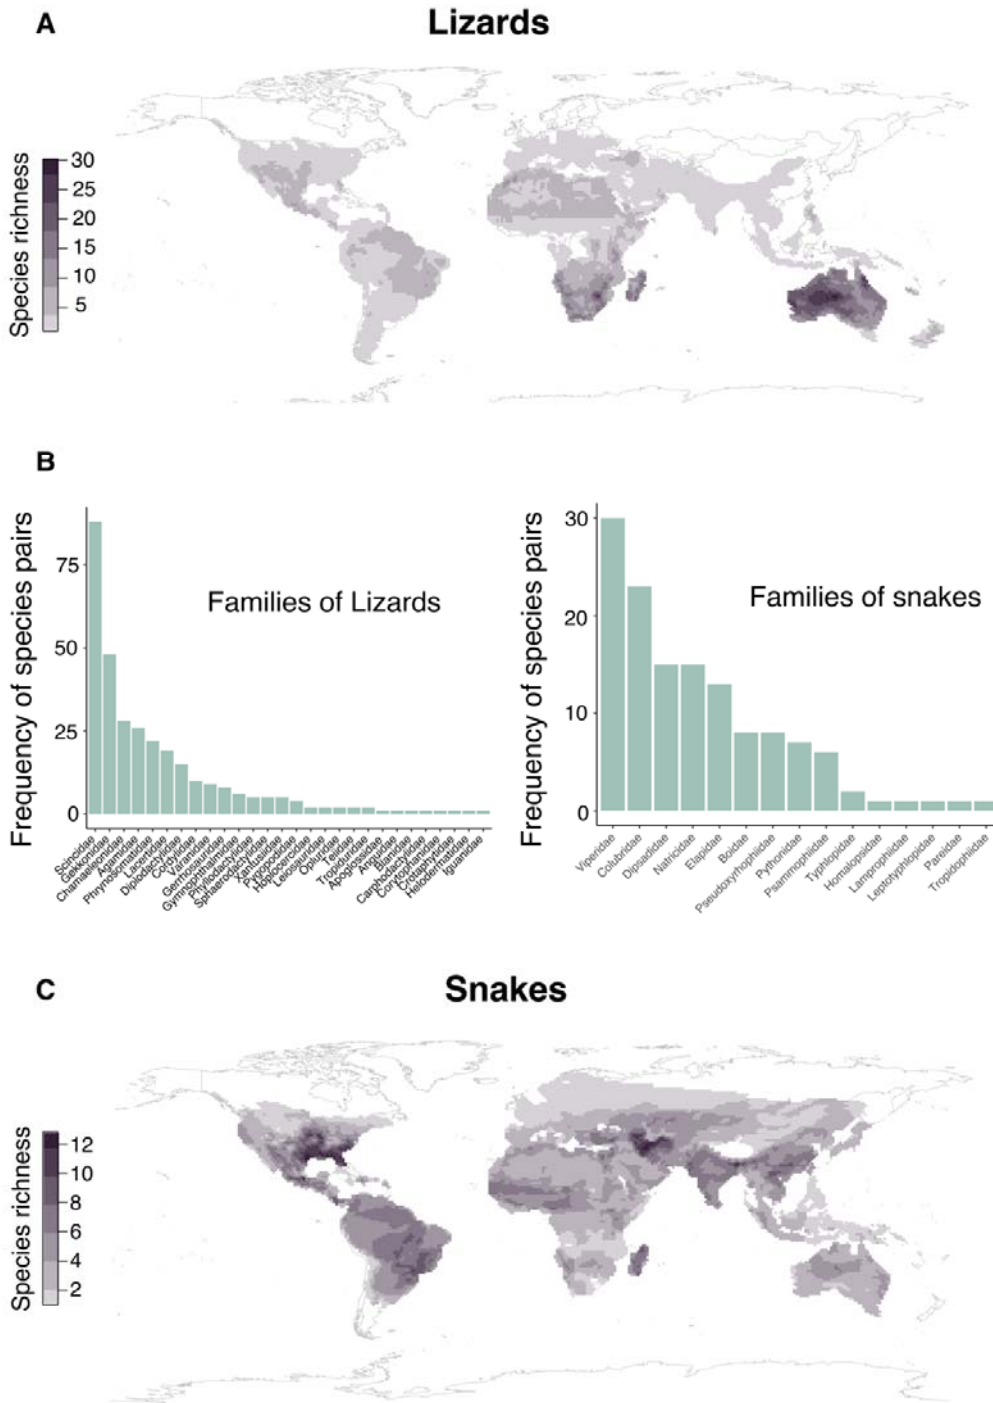

1059

1060 **Figure 1.** Species diversity analyzed in the present study across geographical regions (a,  
 1061 c) and the taxonomic diversity of the species pairs (b) of lizards and snakes included in  
 1062 our analyses.

1063

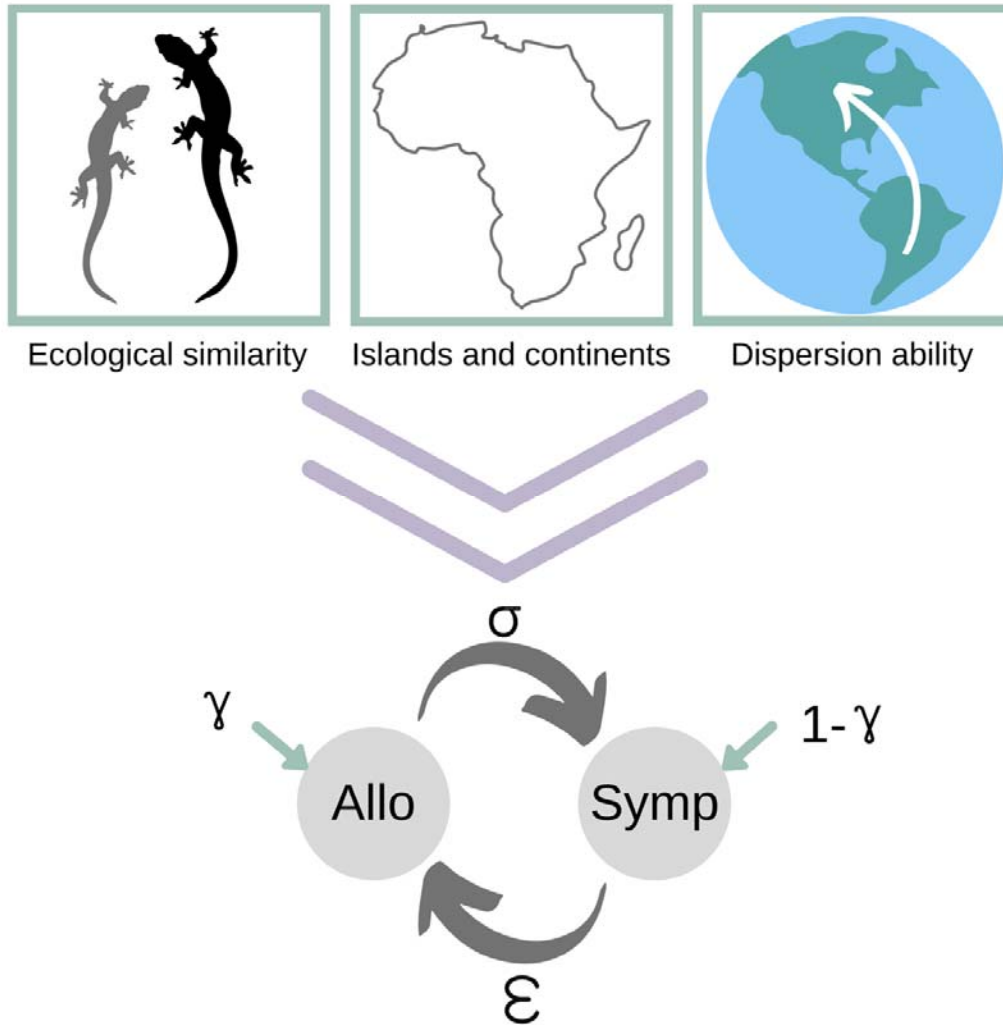

1064

1065 **Figure 2.** Summary of the statistical models compared in the present study and their

1066 parameters.  $\gamma$  = relative frequency of allopatric speciation,  $\sigma$  = transition rate from

1067 allopatry to sympatry,  $\epsilon$  = transition rate from sympatry to allopatry. We included

1068 ecological similarity (i.e. body size and shape differences), occurrence on islands or

1069 continents, and the dispersion ability (i.e. range size/age ratio and mean body size)

1070 separately as covariates on the transition rate to sympatry. Modified from Pigot &

1071 Tobias (2015).

1072

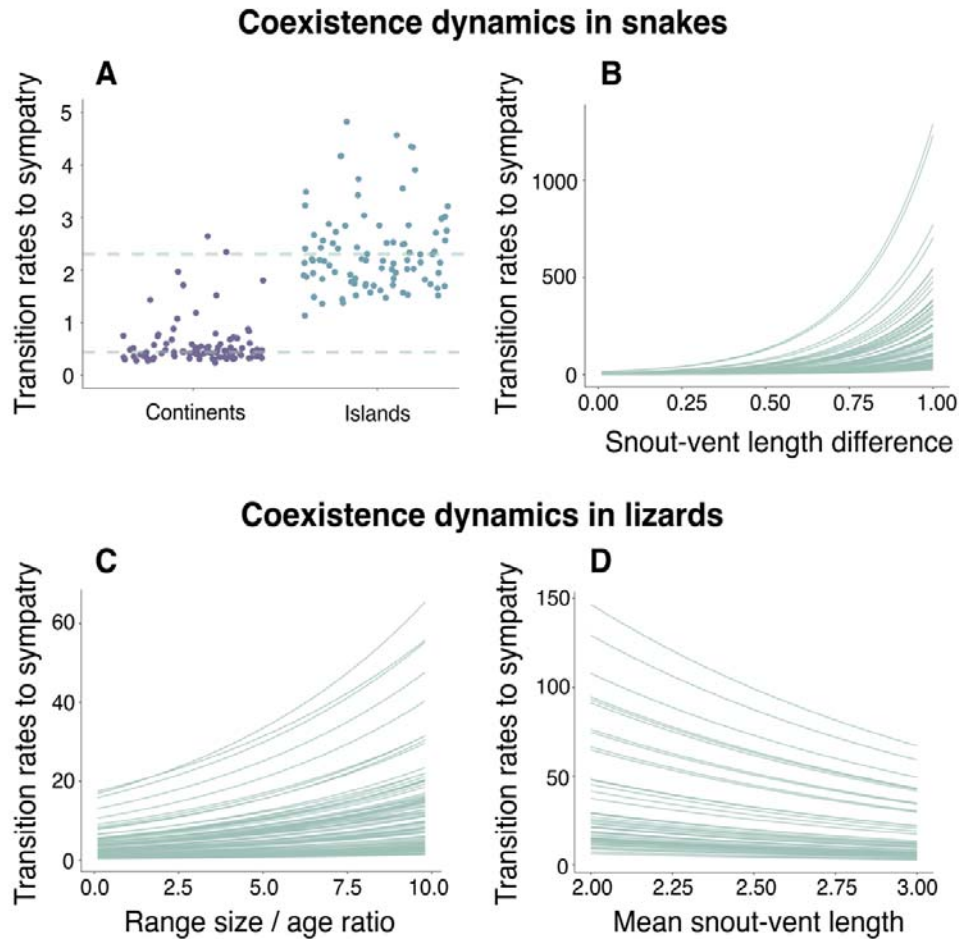

1073

1074 **Figure 3.** Estimates of transitions rates to sympatry relative to (a) species pairs  
1075 occurrence on islands or continents, (b) snout-vent length difference, and (c) dispersal  
1076 ability (range size / age ratio and mean snout-vent length), under the best model selected  
1077 for snakes (a, b) and lizards (c, d). Multiple dots and lines represent estimates when  
1078 using distinct age datasets (see Methods). Dashed lines in panel (a) represent medians of  
1079 transition rates taken across all estimates. Given the extremely high values of 12 of  
1080 these estimates (1 continent and 11 island), we excluded these from the plot for  
1081 visualization purposes.

1082

1083

1084
